# Supplementary material for: “Fitspiration” on Social Media: A Content Analysis of Gendered Images
Source: PubMed Central journal article supplement (PMC5390113; doi:10.2196/jmir.6368), 2017-03-29
Supplement: jmir_v19i3e95_app1.pdf [file jmir_v19i3e95_app1.pdf]

## **Appendix 1 – Content analysis codebook**

**Categorical variables**

| #  | Variable name    | $\kappa$ | % agree      | Description                                                                                                    | Example                                                                                             |
|----|------------------|----------|--------------|----------------------------------------------------------------------------------------------------------------|-----------------------------------------------------------------------------------------------------|
| 1  | Relevancy        | .73      | 93.7         | Post is relevant to fitspiration (Y/N)                                                                         | Content related to exercise, health, diet or body appearance                                        |
| 2  | Platform         | .98      | 99.5         | Platform on which the post appears (Instagram, Twitter, Tumblr, or Facebook)                                   |                                                                                                     |
| 3  | Text             | .70.1    | 91.2         | Post contains motivational or inspirational quote/text embedded in an image or as an image (Y/N)               | 'Unleash the beast' (grey text overlaying a muscular man lifting weights)                           |
| 4  | Caption          | .75      | 92.5         | Post contains a caption or other text added by the person who posted it (Y/N)                                  | Text: 'Breakfast! Spinach, greek yoghurt, oats...' accompanying photo of breakfast                  |
| 5  | Photo            | .8485    | 94.8         | Post contains a photo (Y/N)                                                                                    | -                                                                                                   |
| 6  | Video            | .96      | 99.2         | Post contains or links to a video (Y/N)                                                                        | -                                                                                                   |
| 7  | Selfie           | .88      | 95.6         | Post contains a selfie (Y/N)                                                                                   | -                                                                                                   |
| 8  | Food             | .91      | 97.2         | Post's content thematically relates to food in some way (Y/N)                                                  | A photo of a meal, description of a meal plan                                                       |
| 9  | Exercise         | .61      | 93.83        | Post's content thematically relates to exercise in some way (Y/N)                                              | Text describing an exercise routine, photo in a gym                                                 |
| 10 | Face             | .79      | 90.4         | A person's face is visible in the post (Y/N)                                                                   | -                                                                                                   |
| 11 | Full body        | .74      | 87.8         | A person's whole body or nearly whole body is visible in the post (clothed or unclothed) (Y/N)                 | -                                                                                                   |
| 12 | Stomach          | .76      | 89.9         | Post contains image emphasising subjects' stomach (Y/N)                                                        | -                                                                                                   |
| 13 | Buttocks         | .61      | 92.0         | Post contains image emphasising subjects' buttocks (Y/N)                                                       | -                                                                                                   |
| 14 | Sexualisation    | .72      | 89.4         | Post is sexual in nature (i.e. contains a 'sexual' or 'sexy' image, and/or references sex or being sexy) (Y/N) | Photo emphasising crotch/buttocks/cleavage, 'sexy' pose (e.g. posing in bikini)                     |
| 15 | Before/after     | .66      | 99.0         | Post references a person before and after weight loss/another body transformation (Y/N)                        | Photos of female subject 1 year apart, before and after getting visible abdominal muscles           |
| 16 | Healthy eating   | .70      | 89.9         | Post emphasises eating 'healthy' food (Y/N)                                                                    | Photo of beef curry with caption 'Healthy choices can still be made on vacation... #healthychoices' |
| 17 | Active exerciser | .80      | 88.1<br>90.4 | Post contains image of a person before, during or after exercise (Y/N)                                         | Selfie of sweaty man in gym changing room with caption 'Two and a half hour workout complete!'      |

**Ordinal and interval variables**

| #  | Variable name | $\rho$ |   | Description                                                                                       | Example |
|----|---------------|--------|---|---------------------------------------------------------------------------------------------------|---------|
| 18 | Thinness      | .74    | - | Thinness rating of main subject of image on Figure Rating Scale [20] (N/A, 1-9, Unable to assess) | -       |
| 19 | Muscularity   | .76    | - | Muscularity rating of person                                                                      | -       |
